# Supplementary material
Source: MDPI journal article supplement (https://www.mdpi.com/2073-4441/11/3/588)
Supplement: s1 [file s1]

# Coupling between Hydrodynamics and Chlorophyll *a* and Bacteria in a Temperate Estuary: A Box Model Approach

Élia Fernandes, Catarina Teixeira and Adriano A. Bordalo

## *Additional Water Column Characterization*

Additional physical-chemical analyses were performed for the water samples collected in the Lima estuary. For the determination of total suspended solids (TSS), the water samples were filtered through pre-combusted glass fiber filters (GF/F Whatman), and dried at 105 °C [1]. The dissolved orthophosphate, nitrite, ammonium and silicate determinations were performed according the methods described by Koroleff [2]. Orthophosphate ions react with an acid solution containing molybdate and antimony ions to form a phosphomolybdate antimony complex, followed by reduction of the latter with ascorbic acid to form a blue molybdenum complex. For dissolved silica quantification, an acidic solution of ammonium molybdate was added to the sample to produce silicomolybdic acid which is then reduced to silicomolybdous acid (a blue compound) using ascorbic acid. Ammonia, in moderately alkaline solutions, reacts with the hypochlorite to form monochloramine, which in the presence of a catalyst (nitroprusside), phenol, and excess hypochlorite gives rise to an intense blue complex (indophenol blue). The nitrite was determined by diazotizing nitrite with sulfanilamide and coupling it with N-(1-naphthyl)-ethylenediamine hydrochloride to form a highly coloured azo dye. The concentration of nitrate was obtained by the method described by Jones [3], and adapted by Joye and Chambers [4], which consists of the nitrite determination procedure, after the reduction of nitrate to nitrite using spongy cadmium (total concentration of NO<sub>x</sub>). The nitrate concentration was obtained subtracting the nitrite from the total concentration of NO<sub>x</sub> obtained. After color development, all nutrients were determined by molecular absorption spectrophotometry. Determination of total dissolved carbon (TDC), dissolved organic carbon (DOC), and total dissolved nitrogen (TDN) was performed by high-temperature catalytic oxidation with a TOC-VCSN analyzer (Shimadzu Instruments), according to Magalhães et al. [5]. Briefly, TDC was measured by high temperature catalytic oxidation followed by nondispersive infrared detection of CO<sub>2</sub>. For DIC determination, samples were automatically acidified (1.5% HCl 2 M), and sparged with carrier gas (purified air) to convert only the inorganic carbon to CO<sub>2</sub>. DOC was determined by the difference between TDC and DIC. TDN was thermally decomposed in a combustion tube and the resulting nitric oxide detected by chemiluminescence. All analyzes were performed in triplicate.

**Table S1.** Mean concentrations ± SE for key environmental parameters measured at the surface of the sampling sites: Secchi disc (SD)—m (in bold-bottom depth); temperature—°C; salinity; dissolved oxygen (DO)—mg O<sub>2</sub> L<sup>-1</sup>; pH; NO<sub>3</sub><sup>-</sup>, NO<sub>2</sub><sup>-</sup>, NH<sub>4</sub><sup>+</sup>, PO<sub>4</sub><sup>3-</sup>, N:P, and Si—µM; chlorophyll *a* (CHL *a*)—mg m<sup>-3</sup>; total cell counts (TCC)—log<sub>10</sub> cells mL<sup>-1</sup>. In brackets—minimum and maximum values.

| Site | SD                 | T                    | Salinity            | DO                  | pH                 | NO <sub>3</sub> <sup>-</sup> | NO <sub>2</sub> <sup>-</sup> | NH <sub>4</sub> <sup>+</sup> | PO <sub>4</sub> <sup>3-</sup> | N:P              | Si                     | CHL <i>a</i>        | TCC                |
|------|--------------------|----------------------|---------------------|---------------------|--------------------|------------------------------|------------------------------|------------------------------|-------------------------------|------------------|------------------------|---------------------|--------------------|
| 1    | 2.48 ± 0.33        | 15.47 ± 1.58         | 18.29 ± 5.89        | 8.80 ± 0.60         | 7.75 ± 0.09        | 19.97 ± 7.09                 | 0.189 ± 0.043                | 1.517 ± 0.355                | 0.384 ± 0.065                 | 60 ± 17          | 47.01 ± 16.59          | 1.04 ± 0.16         | 5.72 ± 0.12        |
|      | <b>(1.30–3.30)</b> | <b>(11.06–20.56)</b> | <b>(1.99–30.30)</b> | <b>(7.69–10.89)</b> | <b>(7.51–7.96)</b> | <b>(9.12–46.75)</b>          | <b>(0.108–0.295)</b>         | <b>(0.818–2.800)</b>         | <b>(0.211–0.562)</b>          | <b>(25–107)</b>  | <b>(15.29–95.67)</b>   | <b>(0.57–1.50)</b>  | <b>(5.38–6.08)</b> |
| 2    | 2.46 ± 0.39        | 15.65 ± 1.57         | 17.32 ± 5.53        | 8.87 ± 0.58         | 7.81 ± 0.07        | 22.42 ± 6.31                 | 0.202 ± 0.046                | 2.000 ± 0.557                | 0.409 ± 0.076                 | 66 ± 15          | 50.49 ± 15.19          | 1.08 ± 0.18         | 5.71 ± 0.15        |
|      | <b>(1.3–3.30)</b>  | <b>(11.06–20.64)</b> | <b>(1.99–29.70)</b> | <b>(7.61–10.89)</b> | <b>(7.57–7.96)</b> | <b>(13.00–46.75)</b>         | <b>(0.110–0.319)</b>         | <b>(0.850–3.877)</b>         | <b>(0.226–0.639)</b>          | <b>(27–107)</b>  | <b>(20.41–95.67)</b>   | <b>(0.57–1.69)</b>  | <b>(5.38–6.17)</b> |
| 3    | 2.32 ± 0.46        | 16.13 ± 1.74         | 12.49 ± 4.44        | 9.14 ± 0.63         | 7.84 ± 0.11        | 25.91 ± 5.15                 | 0.162 ± 0.036                | 1.576 ± 0.335                | 0.355 ± 0.049                 | 81 ± 13          | 64.19 ± 11.75          | 1.29 ± 0.17         | 5.80 ± 0.14        |
|      | <b>(1.10–3.80)</b> | <b>(10.93–21.09)</b> | <b>(1.59–23.30)</b> | <b>(8.14–11.26)</b> | <b>(7.44–8.12)</b> | <b>(16.75–45.71)</b>         | <b>(0.062–0.245)</b>         | <b>(0.839–2.554)</b>         | <b>(0.243–0.477)</b>          | <b>(48–103)</b>  | <b>(35.71–97.58)</b>   | <b>(0.81–1.86)</b>  | <b>(5.56–6.23)</b> |
| 4    | 2.12 ± 0.40        | 16.41 ± 1.88         | 10.05 ± 4.00        | 9.37 ± 0.57         | 7.85 ± 0.12        | 26.56 ± 5.82                 | 0.146 ± 0.032                | 1.746 ± 0.854                | 0.320 ± 0.049                 | 96 ± 17          | 69.79 ± 10.52          | 1.63 ± 0.23         | 5.82 ± 0.15        |
|      | <b>(1.10–3.10)</b> | <b>(10.76–21.28)</b> | <b>(0.40–20.70)</b> | <b>(8.25–11.18)</b> | <b>(7.45–8.21)</b> | <b>(9.46–45.78)</b>          | <b>(0.038–0.222)</b>         | <b>(0.472–5.115)</b>         | <b>(0.205–0.455)</b>          | <b>(32–128)</b>  | <b>(41.35–100.22)</b>  | <b>(0.92–2.38)</b>  | <b>(5.53–6.27)</b> |
| 5    | 1.58 ± 0.34        | 16.63 ± 2.00         | 7.08 ± 3.09         | 9.38 ± 0.60         | 7.79 ± 0.12        | 25.81 ± 3.56                 | 0.118 ± 0.024                | 1.176 ± 0.614                | 0.287 ± 0.048                 | 117 ± 38         | 78.01 ± 7.84           | 2.52 ± 0.52         | 5.96 ± 0.14        |
|      | <b>(1.00–2.90)</b> | <b>(10.52–21.33)</b> | <b>(0.05–15.90)</b> | <b>(8.15–11.31)</b> | <b>(7.46–8.12)</b> | <b>(15.71–35.61)</b>         | <b>(0.046–0.182)</b>         | <b>(0.248–3.563)</b>         | <b>(0.138–0.425)</b>          | <b>(60–262)</b>  | <b>(53.31–100.59)</b>  | <b>(0.66–3.54)</b>  | <b>(5.63–6.33)</b> |
| 6    | 1.60 ± 0.39        | 16.79 ± 2.05         | 5.60 ± 2.53         | 9.39 ± 0.58         | 7.52 ± 0.14        | 35.72 ± 4.16                 | 0.139 ± 0.024                | 0.565 ± 0.167                | 0.238 ± 0.062                 | 208 ± 70         | 82.90 ± 6.91           | 3.39 ± 0.77         | 6.06 ± 0.12        |
|      | <b>(0.80–3.10)</b> | <b>(10.50–21.42)</b> | <b>(0.03–13.40)</b> | <b>(8.23–11.23)</b> | <b>(7.09–7.90)</b> | <b>(27.63–51.37)</b>         | <b>(0.046–0.174)</b>         | <b>(0.141–0.968)</b>         | <b>(0.074–0.439)</b>          | <b>(102–483)</b> | <b>(59.60–101.79)</b>  | <b>(0.75–5.06)</b>  | <b>(5.61–6.26)</b> |
| 7    | 1.30 ± 0.08        | 16.99 ± 2.11         | 4.56 ± 2.01         | 9.58 ± 0.57         | 7.30 ± 0.14        | 30.98 ± 4.55                 | 0.108 ± 0.021                | 0.536 ± 0.206                | 0.249 ± 0.060                 | 152 ± 36         | 83.76 ± 5.23           | 3.79 ± 1.19         | 6.04 ± 0.14        |
|      | <b>(1.10–1.50)</b> | <b>(10.54–21.41)</b> | <b>(0.02–10.30)</b> | <b>(8.19–11.34)</b> | <b>(6.97–7.67)</b> | <b>(19.93–47.56)</b>         | <b>(0.038–0.158)</b>         | <b>(0.018–1.243)</b>         | <b>(0.106–0.462)</b>          | <b>(71–283)</b>  | <b>(66.80–99.55)</b>   | <b>(0.74–6.67)</b>  | <b>(5.50–6.26)</b> |
| 8    | 1.18 ± 0.17        | 17.08 ± 2.15         | 2.50 ± 1.10         | 9.76 ± 0.59         | 7.39 ± 0.15        | 33.98 ± 4.64                 | 0.126 ± 0.012                | 0.916 ± 0.355                | 0.253 ± 0.058                 | 154 ± 29         | 91.67 ± 4.48           | 5.13 ± 2.63         | 5.97 ± 0.10        |
|      | <b>(0.60–1.60)</b> | <b>(10.50–21.10)</b> | <b>(0.00–5.60)</b>  | <b>(8.35–11.63)</b> | <b>(6.90–7.71)</b> | <b>(24.87–49.91)</b>         | <b>(0.094–0.157)</b>         | <b>(0.077–2.047)</b>         | <b>(0.150–0.477)</b>          | <b>(108–265)</b> | <b>(80.57–105.41)</b>  | <b>(0.59–15.24)</b> | <b>(5.59–6.14)</b> |
| 9    | 2.02 ± 0.25        | 17.13 ± 2.19         | 0.30 ± 0.16         | 9.72 ± 0.52         | 7.29 ± 0.24        | 41.05 ± 4.11                 | 0.116 ± 0.020                | 0.867 ± 0.343                | 0.234 ± 0.055                 | 227 ± 70         | 97.89 ± 5.73           | 8.53 ± 3.25         | 5.93 ± 0.08        |
|      | <b>(1.30–2.70)</b> | <b>(10.58–22.20)</b> | <b>(0.00–0.70)</b>  | <b>(8.65–11.63)</b> | <b>(6.68–8.05)</b> | <b>(26.51–50.60)</b>         | <b>(0.038–0.149)</b>         | <b>(0.306–2.068)</b>         | <b>(0.106–0.431)</b>          | <b>(105–499)</b> | <b>(79.68–115.55)</b>  | <b>(0.66–16.50)</b> | <b>(5.63–6.12)</b> |
| 10   | 1.11 ± 0.348       | 19.60 ± 2.11         | 0.46 ± 0.38         | 9.27 ± 0.43         | 7.17 ± 0.21        | 41.61 ± 6.01                 | 0.122 ± 0.031                | 1.912 ± 0.462                | 0.212 ± 0.031                 | 227 ± 59         | 99.36 ± 6.63           | 7.11 ± 3.43         | 5.99 ± 0.04        |
|      | <b>(0.35–2.50)</b> | <b>(13.74–23.30)</b> | <b>(0.00–1.60)</b>  | <b>(8.21–10.07)</b> | <b>(6.66–7.51)</b> | <b>(24.35–51.83)</b>         | <b>(0.046–0.189)</b>         | <b>(0.940–3.164)</b>         | <b>(0.138–0.286)</b>          | <b>(114–391)</b> | <b>(87.64–118.35)</b>  | <b>(1.22–17.04)</b> | <b>(5.90–6.09)</b> |
| 11   | 0.38 ± 0.02        | 21.44 ± 0.89         | 0.04 ± 0.03         | 9.32 ± 0.53         | 7.24 ± 0.14        | 46.44 ± 2.97                 | 0.139 ± 0.030                | 2.225 ± 0.786                | 0.160 ± 0.035                 | 339 ± 87         | 105.35 ± 8.23          | 6.80 ± 1.70         | 6.07 ± 0.01        |
|      | <b>(0.35–0.40)</b> | <b>(20.02–23.08)</b> | <b>(0.00–0.10)</b>  | <b>(8.72–10.38)</b> | <b>(6.98–7.45)</b> | <b>(41.54–51.81)</b>         | <b>(0.108–0.198)</b>         | <b>(1.160–3.758)</b>         | <b>(0.106–0.224)</b>          | <b>(222–508)</b> | <b>(95.45v 121.69)</b> | <b>(3.88–9.78)</b>  | <b>(6.06–6.08)</b> |

**Table S2.** Mean concentrations  $\pm$  SE for key environmental parameters measured at middle depth of the sampling sites: temperature— $^{\circ}$ C; salinity; dissolved oxygen (DO)— $\text{mg O}_2 \text{ L}^{-1}$ ; pH;  $\text{NO}_3^-$ ,  $\text{NO}_2^-$ ,  $\text{NH}_4^+$ ,  $\text{PO}_4^{3-}$ , N:P, and Si— $\mu\text{M}$ ; chlorophyll *a* (CHL *a*)— $\text{mg m}^{-3}$ ; total cell counts (TCC)— $\log_{10}$  cells  $\text{mL}^{-1}$ . In brackets—minimum and maximum values.

| Site | T                                 | Salinity                         | DO                              | pH                             | $\text{NO}_3^-$                   | $\text{NO}_2^-$                    | $\text{NH}_4^+$                    | $\text{PO}_4^{3-}$                 | N:P                       | Si                                  | CHL <i>a</i>                    | TCC                            |
|------|-----------------------------------|----------------------------------|---------------------------------|--------------------------------|-----------------------------------|------------------------------------|------------------------------------|------------------------------------|---------------------------|-------------------------------------|---------------------------------|--------------------------------|
| 1    | 15.48 $\pm$ 1.47<br>(11.24–20.32) | 23.43 $\pm$ 4.36<br>(8.99–33.20) | 8.44 $\pm$ 0.52<br>(7.65–10.51) | 7.59 $\pm$ 0.22<br>(6.73–7.90) | 17.62 $\pm$ 7.54<br>(6.32–47.02)  | 0.224 $\pm$ 0.047<br>(0.084–0.333) | 1.768 $\pm$ 0.587<br>(0.425–3.639) | 0.438 $\pm$ 0.079<br>(0.180–0.593) | 47 $\pm$ 15<br>(18–98)    | 38.21–16.74<br>(10.35–97.65)        | 1.56 $\pm$ 0.35<br>(0.66–2.75)  | 5.72 $\pm$ 0.12<br>(5.40–6.12) |
| 2    | 15.45–1.49<br>(11.24–20.28)       | 23.29 $\pm$ 4.34<br>(8.99–32.60) | 8.35 $\pm$ 0.55<br>(7.52–10.51) | 7.59 $\pm$ 0.22<br>(6.73–7.89) | 18.84 $\pm$ 7.16<br>(9.44–47.02)  | 0.234 $\pm$ 0.043<br>(0.124–0.340) | 1.842 $\pm$ 0.369<br>(0.979–2.758) | 0.452 $\pm$ 0.052<br>(0.336–0.624) | 47 $\pm$ 14<br>(20–98)    | 39.99 $\pm$ 16.14<br>(12.69–97.65)  | 1.75 $\pm$ 0.49<br>(0.66–3.54)  | 5.74 $\pm$ 0.14<br>(5.40–6.14) |
| 3    | 15.30 $\pm$ 1.53<br>(11.00–20.35) | 16.37 $\pm$ 5.66<br>(1.91–28.40) | 8.80 $\pm$ 0.71<br>(7.31–11.11) | 7.68 $\pm$ 0.12<br>(7.21–7.89) | 22.37 $\pm$ 5.87<br>(11.75–43.98) | 0.192 $\pm$ 0.047<br>(0.086–0.319) | 1.609 $\pm$ 0.357<br>(0.944–2.975) | 0.410 $\pm$ 0.073<br>(0.228–0.587) | 70 $\pm$ 20<br>(23–116)   | 52.54 $\pm$ 15.62<br>(15.97–96.75)  | 1.97 $\pm$ 0.38<br>(0.83–3.09)  | 5.86 $\pm$ 0.14<br>(5.56–6.26) |
| 4    | 15.62 $\pm$ 1.67<br>(10.83–20.70) | 13.65 $\pm$ 5.55<br>(0.90–26.20) | 9.00 $\pm$ 0.68<br>(7.66–11.13) | 7.65 $\pm$ 0.10<br>(7.26–7.87) | 24.63 $\pm$ 5.71<br>(7.57–43.32)  | 0.167 $\pm$ 0.037<br>(0.054–0.269) | 2.024 $\pm$ 1.139<br>(0.551–6.533) | 0.338 $\pm$ 0.073<br>(0.202–0.593) | 94 $\pm$ 19<br>(24–132)   | 65.37 $\pm$ 13.10<br>(28.21–100.15) | 2.64 $\pm$ 0.52<br>(0.91–3.95)  | 5.87 $\pm$ 0.16<br>(5.56–6.29) |
| 5    | 16.57 $\pm$ 1.97<br>(10.54–21.33) | 7.22 $\pm$ 3.16<br>(0.05–16.40)  | 9.32 $\pm$ 0.60<br>(8.02–11.22) | 7.61 $\pm$ 0.14<br>(7.18–7.87) | 34.09 $\pm$ 4.23<br>(23.11–49.13) | 0.146 $\pm$ 0.029<br>(0.038–0.206) | 1.220 $\pm$ 0.560<br>(0.321–3.390) | 0.293 $\pm$ 0.055<br>(0.154–0.477) | 136 $\pm$ 26<br>(77–230)  | 76.98 $\pm$ 7.93<br>(52.27–100.25)  | 2.73 $\pm$ 0.59<br>(0.74–3.90)  | 6.02 $\pm$ 0.15<br>(5.66–6.35) |
| 6    | 16.81 $\pm$ 2.05<br>(10.50–21.41) | 5.89 $\pm$ 2.63<br>(0.04–13.85)  | 9.44 $\pm$ 0.57<br>(8.19–11.23) | 7.43 $\pm$ 0.12<br>(7.06–7.73) | 34.71 $\pm$ 4.19<br>(28.71–51.24) | 0.134 $\pm$ 0.022<br>(0.054–0.182) | 0.639 $\pm$ 0.168<br>(0.139–1.198) | 0.253 $\pm$ 0.064<br>(0.106–0.473) | 171 $\pm$ 38<br>(98–314)  | 83.02 $\pm$ 7.40<br>(58.04–103.23)  | 3.55 $\pm$ 0.81<br>(0.75–4.79)  | 6.05 $\pm$ 0.12<br>(5.61–6.27) |
| 7    | 16.98 $\pm$ 2.11<br>(10.54–21.41) | 4.59 $\pm$ 2.02<br>(0.02–10.40)  | 9.56 $\pm$ 0.58<br>(8.18–11.33) | 7.27 $\pm$ 0.15<br>(6.91–7.64) | 32.64 $\pm$ 3.96<br>(26.05–47.92) | 0.116 $\pm$ 0.020<br>(0.038–0.149) | 0.535 $\pm$ 0.182<br>(0.156–1.161) | 0.244 $\pm$ 0.064<br>(0.106–0.477) | 166 $\pm$ 38<br>(99–306)  | 83.61 $\pm$ 5.36<br>(66.18–99.87)   | 3.93 $\pm$ 1.15<br>(0.70–6.85)  | 6.05 $\pm$ 0.12<br>(5.56–6.26) |
| 8    | 17.00 $\pm$ 2.12<br>(10.50–21.11) | 2.88 $\pm$ 1.39<br>(0.00–7.45)   | 9.75 $\pm$ 0.60<br>(8.30–11.58) | 7.30 $\pm$ 0.15<br>(6.84–7.64) | 34.89 $\pm$ 4.22<br>(26.67–49.85) | 0.130 $\pm$ 0.018<br>(0.066–0.162) | 0.915 $\pm$ 0.350<br>(0.048–2.137) | 0.245 $\pm$ 0.067<br>(0.142–0.507) | 187 $\pm$ 43<br>(101–311) | 91.36 $\pm$ 5.54<br>(75.67–108.11)  | 5.76 $\pm$ 2.64<br>(0.62–15.47) | 5.99 $\pm$ 0.10<br>(5.62–6.15) |
| 9    | 16.98 $\pm$ 2.11<br>(13.74–23.30) | 0.70 $\pm$ 0.41<br>(0.00–2.20)   | 9.58 $\pm$ 0.58<br>(8.10–11.41) | 7.07 $\pm$ 0.16<br>(6.58–7.52) | 36.39 $\pm$ 4.63<br>(25.25–50.16) | 0.092 $\pm$ 0.016<br>(0.054–0.133) | 1.066 $\pm$ 0.358<br>(0.105–1.937) | 0.186 $\pm$ 0.021<br>(0.135–0.235) | 207 $\pm$ 23<br>(146–289) | 97.51 $\pm$ 5.23<br>(80.80–113.07)  | 8.57 $\pm$ 3.23<br>(0.57–15.07) | 5.91 $\pm$ 0.09<br>(5.65–6.13) |
| 10   | 19.60 $\pm$ 2.11<br>(13.74–23.30) | 0.436 $\pm$ 0.39<br>(0.00–1.60)  | 9.22 $\pm$ 0.44<br>(8.21–10.07) | 7.15 $\pm$ 0.20<br>(6.66–7.51) | 36.60 $\pm$ 6.62<br>(24.35–51.83) | 0.112 $\pm$ 0.034<br>(0.046–0.189) | 1.933 $\pm$ 0.482<br>(0.940–3.249) | 0.223 $\pm$ 0.041<br>(0.138–0.332) | 206 $\pm$ 68<br>(91–391)  | 99.54 $\pm$ 6.61<br>(87.64–118.35)  | 7.11 $\pm$ 3.43<br>(1.22–17.04) | 6.01 $\pm$ 0.04<br>(5.90–6.09) |
| 11   | 21.44 $\pm$ 0.89<br>(20.02–23.08) | 0.04 $\pm$ 0.03<br>(0.00–0.10)   | 9.32 $\pm$ 0.53<br>(8.72–10.38) | 7.24 $\pm$ 0.14<br>(6.98–7.45) | 46.44 $\pm$ 2.97<br>(41.54–51.81) | 0.139 $\pm$ 0.030<br>(0.108–0.198) | 2.225 $\pm$ 0.786<br>(1.160–3.758) | 0.160 $\pm$ 0.035<br>(0.106–0.224) | 339 $\pm$ 87<br>(222–508) | 105.35 $\pm$ 8.23<br>(95.45–121.69) | 6.80 $\pm$ 1.70<br>(3.88–9.78)  | 6.07 $\pm$ 0.01<br>(6.06.08)   |

**Table S3.** Mean concentrations  $\pm$  SE for key environmental parameters measured near bottom of the sampling sites: temperature— $^{\circ}$ C; salinity; dissolved oxygen (DO)— $\text{mg O}_2 \text{ L}^{-1}$ ; pH;  $\text{NO}_3^-$ ,  $\text{NO}_2^-$ ,  $\text{NH}_4^+$ ,  $\text{PO}_4^{3-}$ , N:P, and Si— $\mu\text{M}$ ; chlorophyll *a* (CHL *a*)— $\text{mg m}^{-3}$ ; total cell counts (TCC)— $\log_{10}$  cells  $\text{mL}^{-1}$ . In brackets—minimum and maximum values.

| Site | T                                 | Salinity                          | DO                               | pH                             | $\text{NO}_3^-$                   | $\text{NO}_2^-$                    | $\text{NH}_4^+$                    | $\text{PO}_4^{3-}$                 | N:P                       | Si                                  | CHL <i>a</i>                    | TCC                            |
|------|-----------------------------------|-----------------------------------|----------------------------------|--------------------------------|-----------------------------------|------------------------------------|------------------------------------|------------------------------------|---------------------------|-------------------------------------|---------------------------------|--------------------------------|
| 1    | 15.48 $\pm$ 1.19<br>(12.56–19.13) | 30.32 $\pm$ 1.69<br>(26.00–30.90) | 8.02 $\pm$ 0.37<br>(7.28–9.24)   | 7.76 $\pm$ 0.16<br>(7.20–8.14) | 9.37 $\pm$ 3.27<br>(1.10–21.07)   | 0.233–0.045<br>(0.060–0.317)       | 1.613 $\pm$ 0.629<br>(0.000–3.428) | 0.394 $\pm$ 0.073<br>(0.165–0.593) | 28 $\pm$ 9<br>(7–55)      | 17.57 $\pm$ 7.38<br>(2.25–41.33)    | 2.33 $\pm$ 0.66<br>(1.14–4.87)  | 5.79 $\pm$ 0.10<br>(5.55–6.13) |
| 2    | 15.61 $\pm$ 1.33<br>(12.56–19.87) | 30.06 $\pm$ 1.56<br>(26.00–33.70) | 7.95 $\pm$ 0.35<br>(7.25–9.24)   | 7.76 $\pm$ 0.16<br>(7.20–8.14) | 9.86 $\pm$ 3.09<br>(2.23–21.07)   | 0.240 $\pm$ 0.048<br>(0.060–0.343) | 1.881 $\pm$ 0.528<br>(0.830–3.536) | 0.466 $\pm$ 0.087<br>(0.272–0.731) | 28 $\pm$ 8<br>(12–55)     | 18.18 $\pm$ 7.12<br>(4.82–41.33)    | 2.05 $\pm$ 0.34<br>(1.47–3.37)  | 5.79 $\pm$ 0.11<br>(5.55–6.07) |
| 3    | 14.89 $\pm$ 1.49<br>(11.20–20.06) | 23.83 $\pm$ 4.21<br>(11.66–32.20) | 8.49 $\pm$ 0.61<br>(7.18–10.36)  | 7.61 $\pm$ 0.20<br>(6.88–7.93) | 16.14 $\pm$ 5.38<br>(5.96–36.39)  | 0.226 $\pm$ 0.050<br>(0.076–0.340) | 2.005 $\pm$ 0.446<br>(1.124–3.652) | 0.457 $\pm$ 0.064<br>(0.257–0.639) | 40 $\pm$ 10<br>(22–75)    | 37.91 $\pm$ 14.90<br>(12.61–89.83)  | 2.22 $\pm$ 0.54<br>(0.91–4.16)  | 5.84 $\pm$ 0.14<br>(5.52–6.21) |
| 4    | 15.02 $\pm$ 1.58<br>(10.89–20.48) | 19.61 $\pm$ 5.39<br>(1.45–31.10)  | 8.69 $\pm$ 0.74<br>(7.32–11.08)  | 7.57 $\pm$ 0.15<br>(7.17–7.88) | 19.81 $\pm$ 7.94<br>(4.70–50.22)  | 0.205 $\pm$ 0.035<br>(0.132–0.287) | 2.592 $\pm$ 0.834<br>(1.368–5.895) | 0.426 $\pm$ 0.068<br>(0.272–0.654) | 58 $\pm$ 18<br>(17–116)   | 46.35 $\pm$ 15.02<br>(16.63–99.82)  | 3.04 $\pm$ 0.53<br>(1.00–3.83)  | 5.91 $\pm$ 0.14<br>(5.63–6.30) |
| 5    | 16.44 $\pm$ 1.93<br>(10.54–21.33) | 7.33 $\pm$ 3.20<br>(0.056–16.70)  | 9.35 $\pm$ 0.59<br>(8.154–11.19) | 7.55 $\pm$ 0.14<br>(7.10–7.81) | 31.12 $\pm$ 4.16<br>(21.86–45.60) | 0.133 $\pm$ 0.023<br>(0.046–0.174) | 0.655 $\pm$ 0.122<br>(0.321–1.042) | 0.298 $\pm$ 0.073<br>(0.122–0.552) | 126 $\pm$ 24<br>(65–203)  | 76.32 $\pm$ 7.75<br>(52.31–97.73)   | 3.14 $\pm$ 0.79<br>(0.75–4.86)  | 6.01 $\pm$ 0.15<br>(5.63–6.35) |
| 6    | 16.77 $\pm$ 2.04<br>(10.50–21.40) | 6.11 $\pm$ 2.73<br>(0.04–14.30)   | 9.43 $\pm$ 0.58<br>(8.15–11.22)  | 7.37 $\pm$ 0.13<br>(7.03–7.72) | 34.77 $\pm$ 4.24<br>(28.74–51.11) | 0.145 $\pm$ 0.022<br>(0.062–0.190) | 0.558 $\pm$ 0.236<br>(0.080–1.427) | 0.258 $\pm$ 0.073<br>(0.090–0.507) | 185 $\pm$ 56<br>(93–394)  | 82.64 $\pm$ 7.91<br>(56.49–104.67)  | 3.92 $\pm$ 0.95<br>(0.74–5.57)  | 6.04 $\pm$ 0.12<br>(5.62–6.28) |
| 7    | 16.97 $\pm$ 2.11<br>(10.54–21.40) | 4.62 $\pm$ 2.04<br>(0.02–10.50)   | 9.54 $\pm$ 0.58<br>(8.16–11.31)  | 7.23 $\pm$ 0.15<br>(6.85–7.61) | 34.30 $\pm$ 3.69<br>(27.60–48.27) | 0.124 $\pm$ 0.022<br>(0.038–0.158) | 0.534 $\pm$ 0.163<br>(0.139–1.078) | 0.240 $\pm$ 0.068<br>(0.106–0.492) | 180 $\pm$ 41<br>(101–330) | 83.46 $\pm$ 5.50<br>(65.57–100.19)  | 4.08 $\pm$ 1.15<br>(0.66–7.02)  | 6.05 $\pm$ 0.12<br>(5.62–6.28) |
| 8    | 16.93 $\pm$ 2.09<br>(10.50–21.12) | 3.25 $\pm$ 1.70<br>(0.00–9.30)    | 9.74 $\pm$ 0.61<br>(8.24–11.52)  | 7.21 $\pm$ 0.15<br>(6.77–7.56) | 35.80 $\pm$ 4.18<br>(26.71–49.79) | 0.134 $\pm$ 0.026<br>(0.038–0.198) | 0.915 $\pm$ 0.407<br>(0.018–2.227) | 0.236 $\pm$ 0.079<br>(0.090–0.537) | 219 $\pm$ 69<br>(94–469)  | 91.04 $\pm$ 6.66<br>(70.77–110.81)  | 6.40 $\pm$ 2.68<br>(0.66–15.69) | 6.00 $\pm$ 0.09<br>(5.65–6.16) |
| 9    | 16.09 $\pm$ 1.80<br>(10.54–20.68) | 6.79 $\pm$ 3.90<br>(0.00–16.70)   | 9.13 $\pm$ 0.72<br>(7.33–11.40)  | 7.07 $\pm$ 0.21<br>(6.50–7.65) | 33.28 $\pm$ 5.12<br>(22.53–48.03) | 0.138 $\pm$ 0.026<br>(0.038–0.174) | 1.065 $\pm$ 0.375<br>(0.141–2.161) | 0.223 $\pm$ 0.051<br>(0.090–0.348) | 192 $\pm$ 47<br>(70–312)  | 80.00 $\pm$ 9.07<br>(53.43–102.31)  | 8.28 $\pm$ 3.54<br>(0.74–17.24) | 5.98 $\pm$ 0.09<br>(5.63–6.14) |
| 10   | 19.62 $\pm$ 2.11<br>(13.74–23.30) | 0.43 $\pm$ 0.39<br>(0.00–1.60)    | 9.20 $\pm$ 0.435<br>(8.21–10.07) | 7.12 $\pm$ 0.19<br>(6.66–7.51) | 40.99 $\pm$ 5.86<br>(24.35–51.83) | 0.126 $\pm$ 0.030<br>(0.046–0.189) | 1.895 $\pm$ 0.448<br>(0.940–3.098) | 0.196 $\pm$ 0.021<br>(0.138–0.228) | 236 $\pm$ 57<br>(114–391) | 99.31 $\pm$ 6.63<br>(87.64–118.35)  | 6.81 $\pm$ 3.50<br>(1.22–17.04) | 6.01 $\pm$ 0.04<br>(5.90–6.09) |
| 11   | 21.44 $\pm$ 0.89<br>(20.02–23.08) | 0.04 $\pm$ 0.03<br>(0.00–0.10)    | 9.32 $\pm$ 0.53<br>(8.72–10.38)  | 7.24 $\pm$ 0.14<br>(6.98–7.45) | 46.44 $\pm$ 2.97<br>(41.54–51.81) | 0.139 $\pm$ 0.030<br>(0.108–0.198) | 2.225 $\pm$ 0.786<br>(1.160–3.758) | 0.160 $\pm$ 0.035<br>(0.106–0.224) | 339 $\pm$ 87<br>(222–508) | 105.35 $\pm$ 8.23<br>(95.45–121.69) | 6.80 $\pm$ 1.70<br>(3.88–9.78)  | 6.07 $\pm$ 0.01<br>(6.06–6.08) |

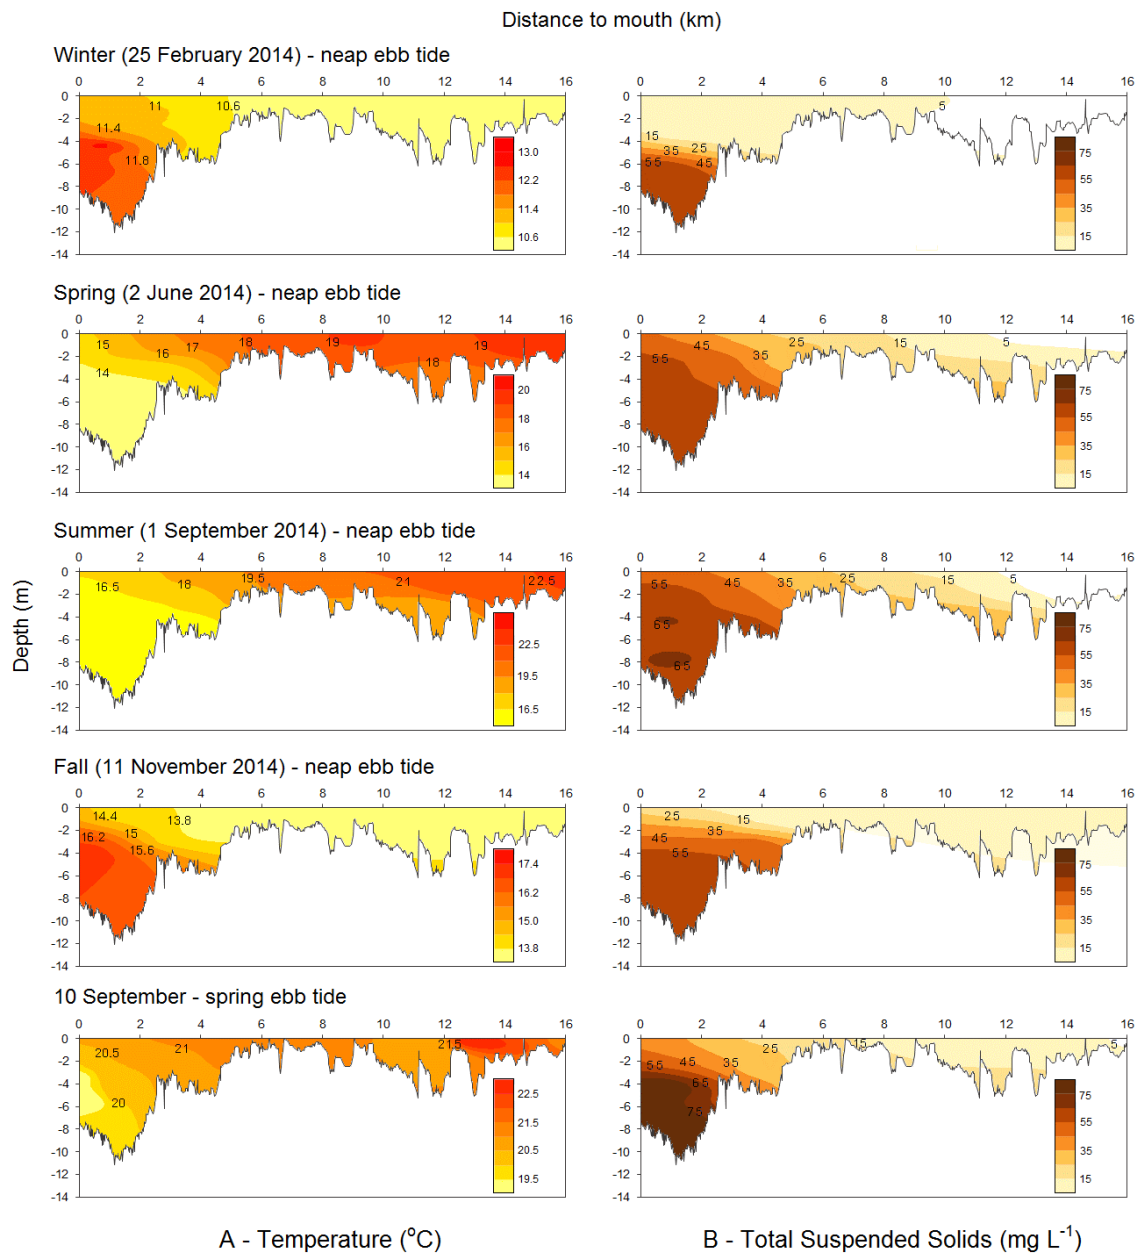

**Figure S1.** Longitudinal profiles of temperature and total suspended solids in the temperate Lima estuary.

## References

1. American Public Health Association (APHA); American Water Works Association (AWWA); Water Environmental Federation (WEF). *Standard Methods for the Examination of Water and Wastewater*, 18th ed.; American Public Health Association: Washington, DC, USA, 1992; pp. 256–257.
2. Grasshoff, K.; Ehrhardt, M.; Kremling, K. (Eds.) *Methods of Seawater Analysis*, 2nd ed.; Chemie: Weinheim, Germany, 1983; ISBN 3-527-25998-8.
3. Jones, M.N. Nitrate reduction by shaking with cadmium: Alternative to cadmium columns. *Water Res.* **1984**, *18*, 643–646.
4. Joye, S.B.; Chambers, R.M. Nitrogen Exchange between Microvegetated Intertidal Sediments and the Overlying Water Column. In Proceedings of the Estuarine Research Federation Annual Meeting, Hilton Head, SC, USA, 14 November 1993.

5. Magalhães, C.; Teixeira, C.; Teixeira, R.; Machado, A.; Azevedo, I.; Bordalo, A.A. Dissolved organic carbon and nitrogen dynamics in the Douro River estuary, Portugal. *Ciencias Marinas* **2008**, *34*, 271–282.

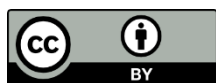

© 2019 by the authors. Submitted for possible open access publication under the terms and conditions of the Creative Commons Attribution (CC BY) license (<http://creativecommons.org/licenses/by/4.0/>).
